# Supplementary material for: Primary Cilia Restrain PI3K-AKT Signaling to Orchestrate Human Decidualization
Source: MDPI journal article supplement (doi:10.3390/ijms232415573), 2022-12-08
Supplement: s1 [file s1]

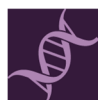

# Primary Cilia Restrain PI3K-AKT Signaling to Orchestrate

## Human Decidualization

Bo Li<sup>1,2</sup>, Ya-Ping Yan<sup>1</sup>, Chen Liang<sup>1</sup>, Yu-Ying He<sup>1</sup>, Ying Wang<sup>1</sup>, Meng-Yuan Li<sup>1</sup>, Si-Ting Chen<sup>1</sup>, Yue Li<sup>1</sup>, Ai-Xia Liu<sup>3</sup>,  
Gui-Jun Yan<sup>4\*</sup> and Zeng-Ming Yang<sup>1,2\*</sup>

### Supplemental materials

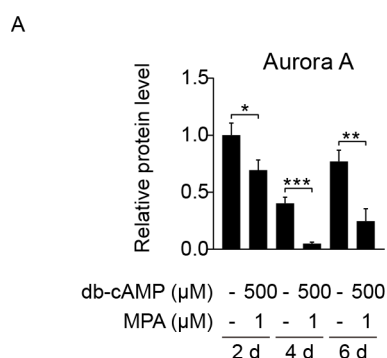

**Figure S1.** Aurora A-mediated primary cilia disassembly inhibits human decidualization. **(A)** Western blot quantification of Aurora A during stromal cells decidualization for 2, 4, and 6 days. In **(A)**, data are presented as means  $\pm$  SD from three independent experiments. \*  $P < 0.05$ , \*\*  $P < 0.01$ , and \*\*\*  $P < 0.001$  by two-tailed Student's  $t$  test for comparing two groups or one-way ANOVA test for comparing more than two groups.

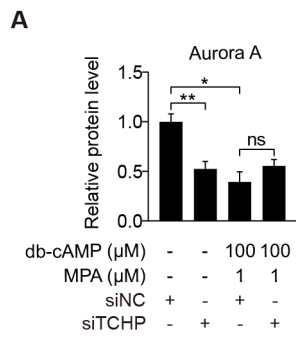

**Figure S2.** Trichoplein act as the activator of Aurora A. **(A)** Western blot quantification of Aurora A after stromal cells were transfected with siTCHP for 24 h then in vitro decidualization for 48 h. In **(A)**, data are presented as means  $\pm$  SD from three independent experiments. ns, ( $P>0.05$ ), \*  $P<0.05$ , and \*\*  $P<0.01$  by two-tailed Student's *t* test for comparing two groups or one-way ANOVA test for comparing more than two groups.

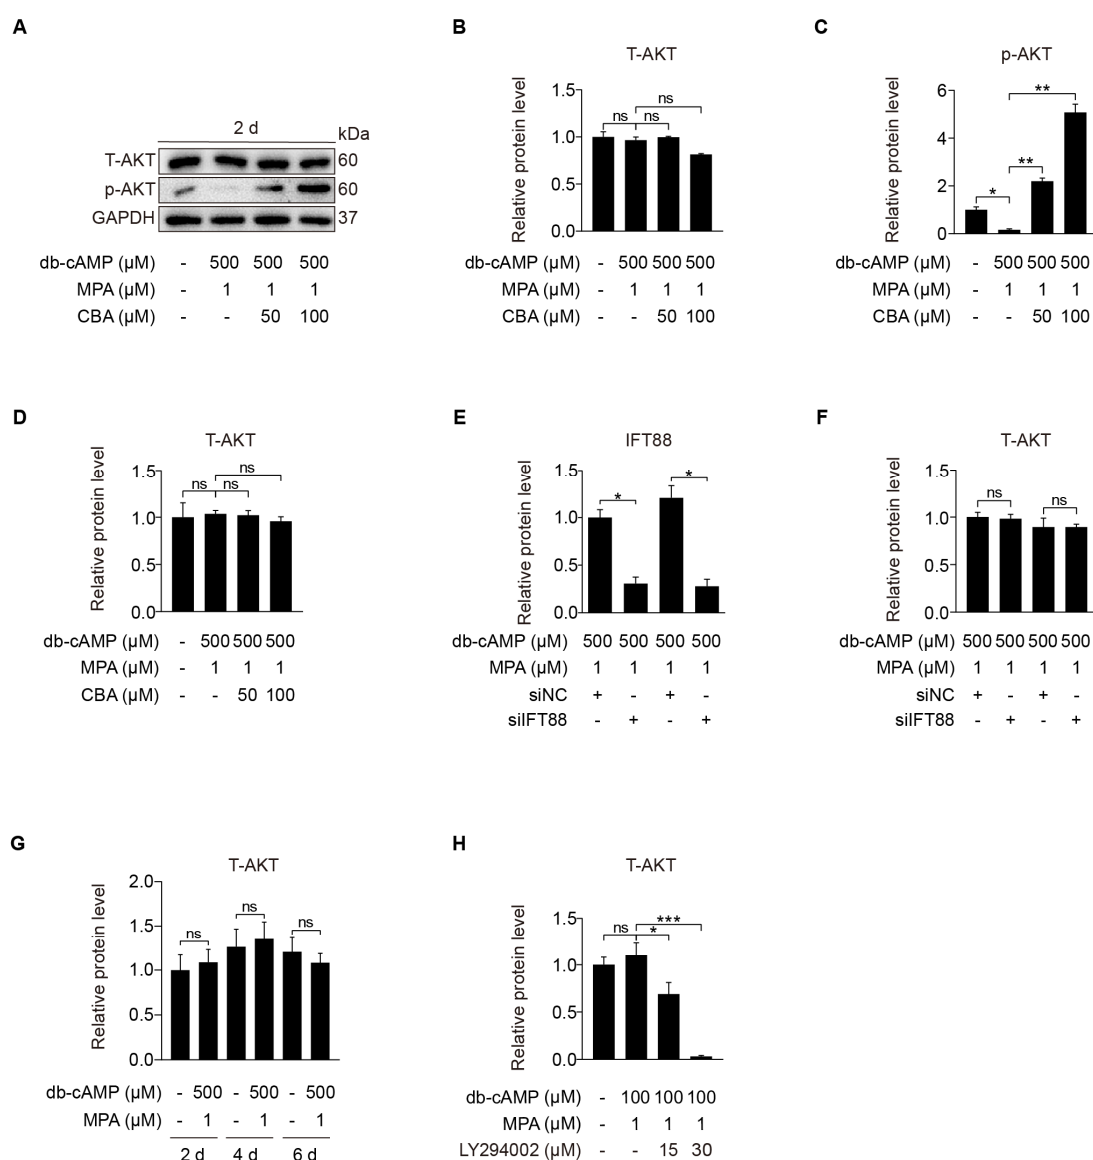

**Figure S3.** Primary cilia negatively control AKT activation (**A** to **C**) Western blot and quantification of T-AKT and p-AKT (S473) after stromal cells were treated with CBA for 24 h during in vitro decidualization for 2 days. (**D**) Western blot quantification of T-AKT after stromal cells were treated with CBA for 24 h during in vitro decidualization for 4 days. (**E** and **F**) Western blot quantification of IFT88 and T-AKT after stromal cells were treated with siIFT88 for 24 h then in vitro decidualization for 2 and 4 days. (**G**) Western blot quantification of T-AKT in stromal cells during decidualization for 2, 4, and 6 days. (**H**) Western blot quantification of T-AKT in LY294002-treated stromal cells for 48 h. In (**A**), the representative images of three biologically independent experiments are shown. In (**B-H**), data are presented as means  $\pm$  SD from three independent experiments. ns, ( $P > 0.05$ ), \*  $P < 0.05$ , \*\*  $P < 0.01$ , and \*\*\*  $P < 0.001$  by two-tailed Student's *t* test for comparing two groups or one-way ANOVA test for comparing more than two groups.

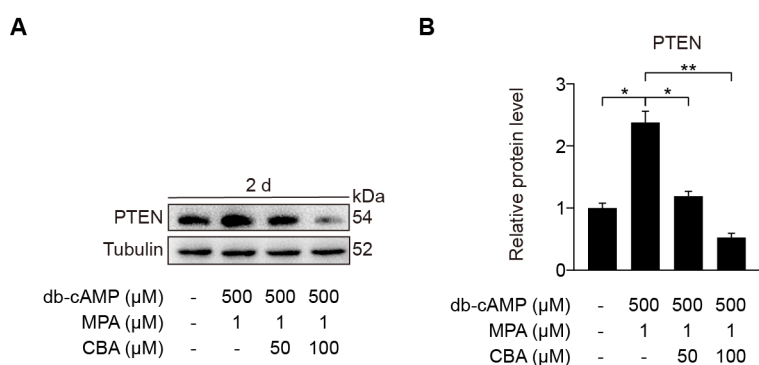

**Figure S4.** PTEN antagonizes AKT during stromal cells decidualization. **(A and B)** Western blot and quantification of PTEN after stromal cells were treated with CBA for 24 h during in vitro decidualization for 4 days. In **(A)**, the representative images of three biologically independent experiments are shown. In **(B)**, data are presented as means  $\pm$  SD from three independent experiments. \*  $P < 0.05$  and \*\*  $P < 0.01$  by two-tailed Student's *t* test for comparing two groups or one-way ANOVA test for comparing more than two groups.

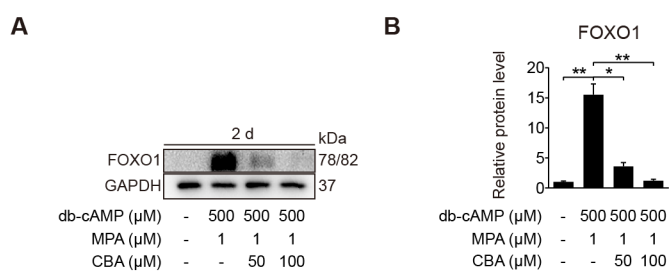

**Figure S5.** Primary cilia modulate FOXO1 expression by suppressing AKT activity. **(A and B)** Western blot and quantification of FOXO1 after stromal cells were treated with CBA for 24 h during in vitro decidualization for 2 days. In **(A)**, the representative images of three biologically independent experiments are shown. In **(B)**, data are presented as means  $\pm$  SD from three independent experiments. \*  $P < 0.05$  and \*\*  $P < 0.01$  by two-tailed Student's  $t$  test for comparing two groups or one-way ANOVA test for comparing more than two groups.

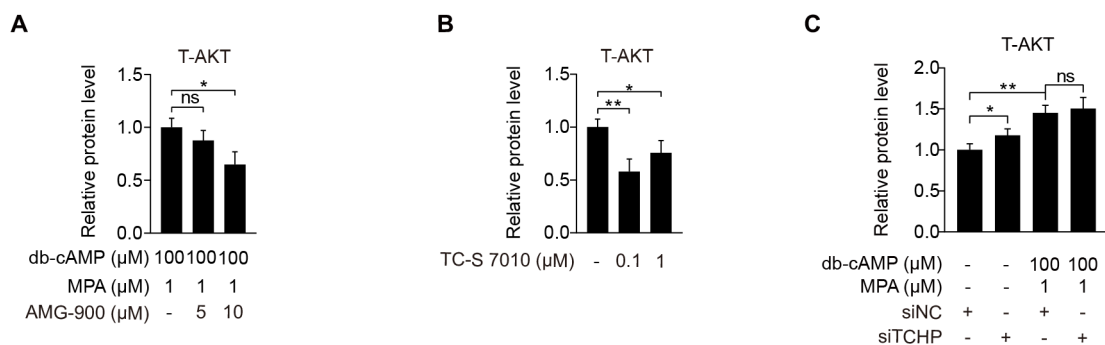

**Figure S6.** Trichoplein-Aurora A-mediated cilia disassembly contributes to PTEN-AKT-FOXO1 signaling. **(A)**

Western blot quantification of T-AKT in AMG-900-treated stromal cells for 48 h. **(B)** Western blot quantification of T-AKT in TC-S 7010-treated stromal cells for 48 h. **(C)** Western blot quantification of T-AKT after stromal cells were transfected with siTCHP for 24 h then in vitro decidualization for 48 h. In **(A)**, **(B)**, and **(C)**, data are presented as means  $\pm$  SD from three independent experiments. ns, ( $P > 0.05$ ), \*  $P < 0.05$ , and \*\*  $P < 0.01$  by two-tailed Student's *t* test for comparing two groups or one-way ANOVA test for comparing more than two groups.
